# Supplementary material for: The Cdx2 homeobox gene suppresses intestinal tumorigenesis through non–cell-autonomous mechanisms
Source: PubMed Central journal article supplement — J Exp Med. 2018 Mar 5;215(3):911–26. doi: 10.1084/jem.20170934 (PMC5839756; doi:10.1084/jem.20170934), 2018-03-05
Supplement: JEM_20170934_sm.pdf [file JEM_20170934_sm.pdf]

SUPPLEMENTAL MATERIAL

Balbinot et al., <https://doi.org/10.1084/jem.20170934>

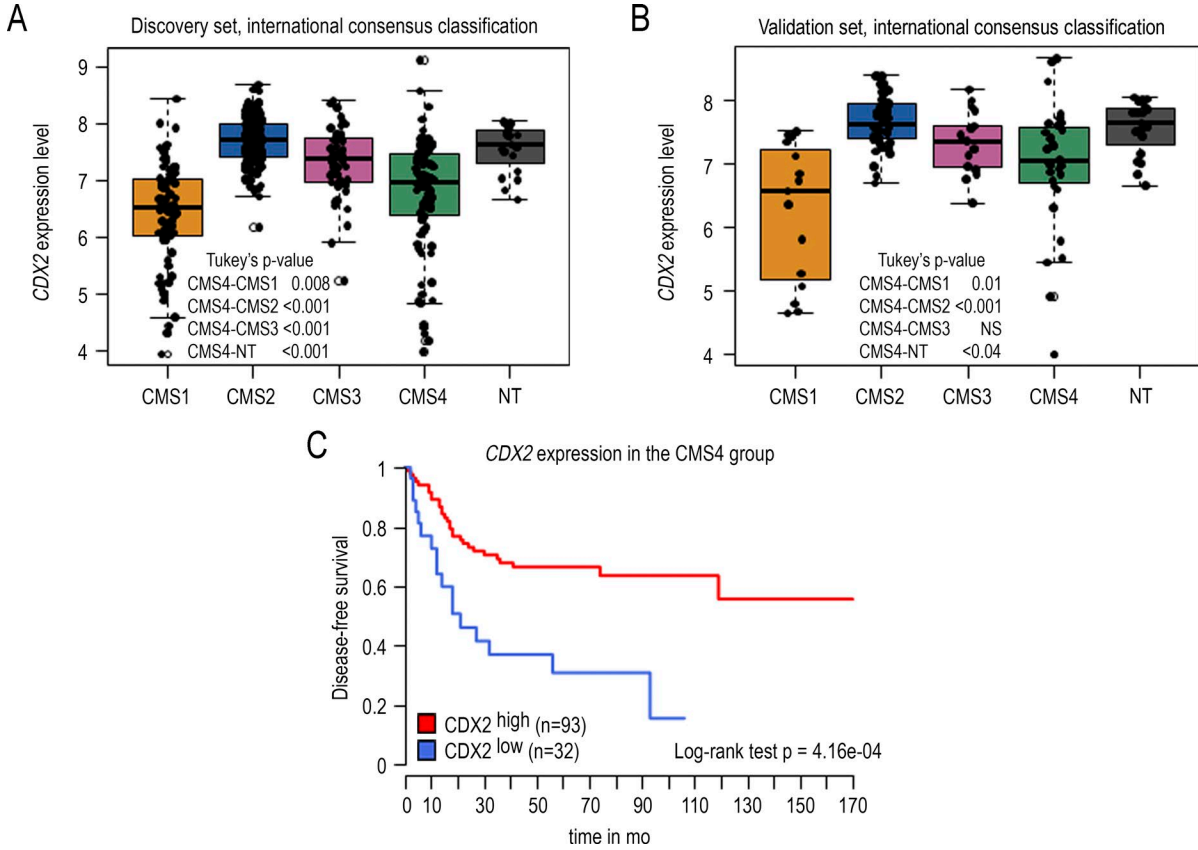

Figure S1. **CDX2** gene expression level in 566 human colon cancers and 19 nontumoral samples of the GSE39582 dataset. **(A)** Boxplot of the level of *CDX2* expression in the 443 samples of the discovery set organized in the four subtypes of the consensus molecular classification of CRC (Guinney et al., 2015). Data are given  $\pm$ SD. *CDX2* is down-regulated in the mesenchymal subtype (CMS4) and significantly different from the other subtypes ( $P = 9.77 \times 10^{-7}$ ). **(B)** Same as A in the 123 samples of the validation set. **(C)** Disease-free survival comparing *CDX2*<sup>high</sup> versus *CDX2*<sup>low</sup> CRC in the CMS4 subtype. *CDX2*<sup>low</sup> patients exhibit a significantly reduced disease-free survival ( $P = 0.0004$ ). P-values were calculated with the log-rank test.

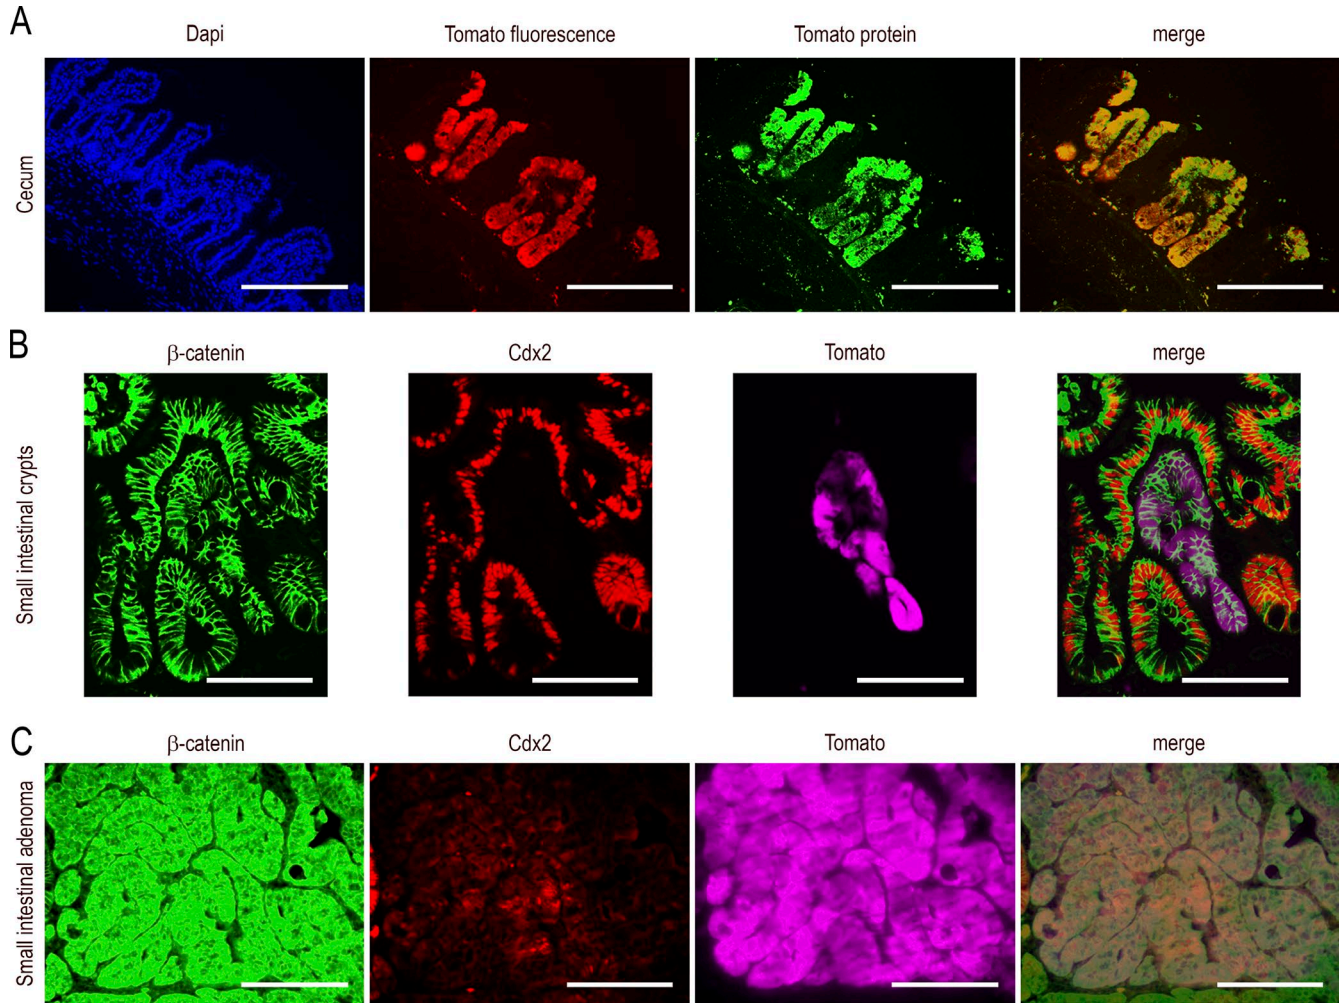

Figure S2. **Validation of the lineage tracing approach and implementation to mixed tumors analysis.** (A) Identical pattern of Tomato in a cecal section of an *AhCre<sup>ERT</sup>::RosaCAG<sup>tdTomato</sup>* mouse, detected first by direct fluorescence emission after the deparaffinization step, and second by indirect fluorescence after subsequent immunolabeling with Tomato antibody. Bars, 100  $\mu$ m. (B) Mutually exclusive patterns of Tomato and Cdx2 in the small intestine of *AhCre<sup>ERT</sup>::Cdx2<sup>fl/fl</sup>::RosaCAG<sup>tdTomato</sup>* mice treated with  $\beta$ NF+Tam. Tomato was detected by direct fluorescence emission, and Cdx2 and  $\beta$ -catenin, by indirect immunofluorescence labeling with Cdx2 and  $\beta$ -catenin antibodies. Bars, 50  $\mu$ m. (C) Demonstration of the maintenance of transcriptional activity at the *Rosa26* locus in the tumor cells of small intestinal adenomas of *Apc<sup>+/\Delta14</sup>::AhCre<sup>ERT</sup>::RosaCAG<sup>tdTomato</sup>* mice. Tomato was detected by direct fluorescence emission, and Cdx2 and  $\beta$ -catenin, by indirect immunofluorescence labeling with Cdx2 and  $\beta$ -catenin antibodies. The cytoplasmic and nuclear localization of  $\beta$ -catenin demonstrates the transformed nature of the cells. Bars, 100  $\mu$ m. Results were obtained in  $n = 3, 4,$  and  $4$  mice in A, B, and C, respectively.

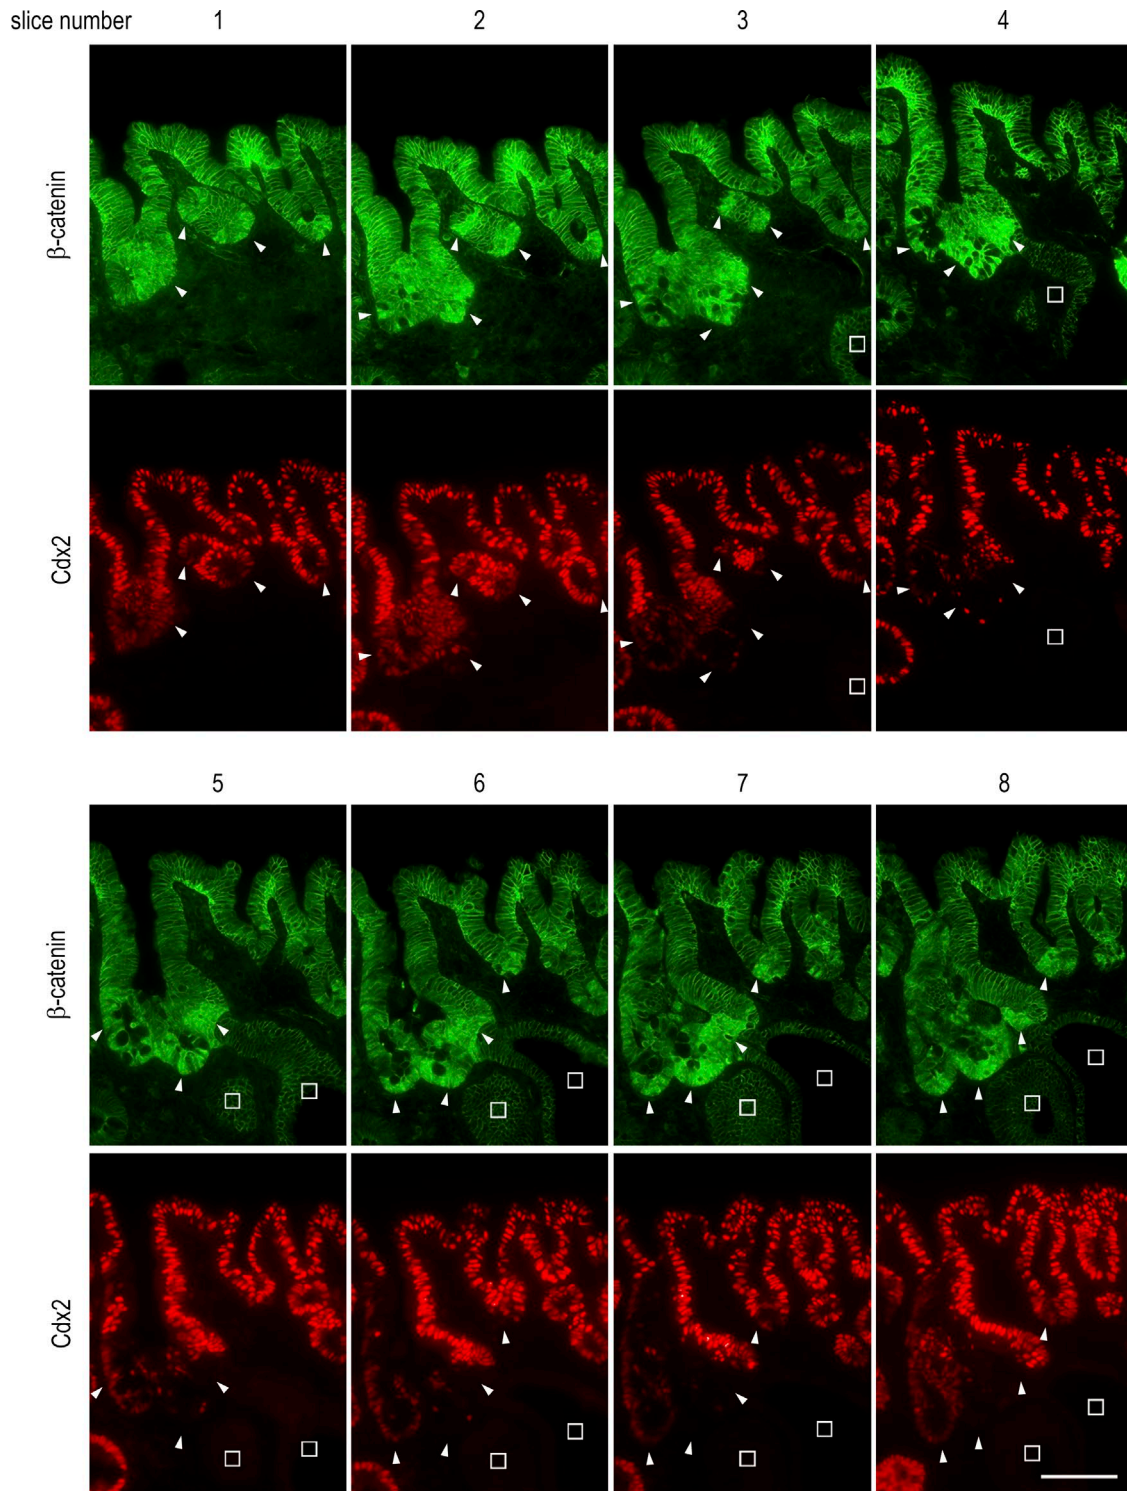

Figure S3. **Surface localization of cells undergoing constitutive activation of the Wnt pathway in mixed tumors.** Immunofluorescence staining of  $\beta$ -catenin and Cdx2 in 8 consecutive sections ( $6\ \mu\text{m}$  each) at the surface of one cecal mixed tumor of an  $Apc^{+/Δ14}::AhCre^{ERT}::Cdx^{fl/fl}$  mouse treated with  $\beta\text{NF}+\text{Tam}$ . The surface sheet of the epithelium shows nontransformed cells identified by membranous localization of  $\beta$ -catenin, as well as groups of cells with constitutive activation of the Wnt pathway labeled by cytoplasmic/nuclear  $\beta$ -catenin. In the consecutive sections, the transformed cells are located in invaginated structures of the surface sheet (arrowheads); in these cells, Cdx2 levels are reduced compared with the levels in adjacent cells with membranous  $\beta$ -catenin. Open squares point to Cdx2-depleted glands. Bar,  $50\ \mu\text{m}$ . Data were obtained in  $n = 3$  mice.

Tables S1 and S2 are provided as Word files. Table S1 shows genes differentially expressed by RNA sequencing in the cecal lesions of *AhCre<sup>ERT</sup>::Cdx2<sup>ff</sup>* mice compared with the cecum of wild-type mice; fold change (FC) > 2;  $q < 0.01$ . Sheet 1 (pages 1–59) is the total list of differentially expressed genes. Sheet 2 (page 60) lists examples of intestinal- versus gastric-type genes differentially expressed in the cecal lesions of *AhCre<sup>ERT</sup>::Cdx2<sup>ff</sup>* mice compared with normal cecum; the cecal lesions of *AhCre<sup>ERT</sup>::Cdx2<sup>ff</sup>* mice compared with normal stomach; the cecal heteroplasia of *Cdx2<sup>+/-</sup>* mice compared with normal cecum; and the cecal heteroplasia of *Cdx2<sup>+/-</sup>* mice compared with normal stomach (Het vs. Sto). Sheet 3 (pages 61 and 62) list genes of the stem cell signature, according to Muñoz et al. (2012), which are differentially expressed in the cecal lesions of *AhCre<sup>ERT</sup>::Cdx2<sup>ff</sup>* mice compared with normal cecum. Sheet 4 (page 63) lists genes encoding extracellular matrix proteins differentially expressed in the cecal lesions of *AhCre<sup>ERT</sup>::Cdx2<sup>ff</sup>* mice compared with normal cecum. Sheet 5 (page 64) lists genes encoding cytokines differentially expressed in the cecal lesions of *AhCre<sup>ERT</sup>::Cdx2<sup>ff</sup>* mice compared with normal cecum.

Table S2 lists genes differentially expressed by RNA sequencing; fold change (FC) > 2;  $q < 0.05$ . Sheet 1 (pages 1–4) show cecal mixed tumors of *Apc<sup>+/ $\Delta$ 14</sup>::AhCre<sup>ERT</sup>::Cdx2<sup>ff</sup>* mice compared with cecal lesions of *AhCre<sup>ERT</sup>::Cdx2<sup>ff</sup>* mice. Sheet 2 (pages 5–17) list small intestinal mixed tumors of *Apc<sup>+/ $\Delta$ 14</sup>::AhCre<sup>ERT</sup>::Cdx2<sup>ff</sup>* mice compared with adenomas of *Apc<sup>+/ $\Delta$ 14</sup>* mice.

## REFERENCES

- Guinney, J., R. Dienstmann, X. Wang, A. de Reyniès, A. Schlicker, C. Soneson, L. Marisa, P. Roepman, G. Nyamundanda, P. Angelino, et al. 2015. The consensus molecular subtypes of colorectal cancer. *Nat. Med.* 21:1350–1356. <https://doi.org/10.1038/nm.3967>
- Muñoz, J., D.E. Stange, A.G. Schepers, M. van de Wetering, B.-K. Koo, S. Itzkovitz, R. Volckmann, K.S. Kung, J. Koster, S. Radulescu, et al. 2012. The Lgr5 intestinal stem cell signature: Robust expression of proposed quiescent ‘+4’ cell markers. *EMBO J.* 31:3079–3091. <https://doi.org/10.1038/emboj.2012.166>
